# Supplementary material for: Efficient synthesis of polymeric g-C3N4 layered materials as novel efficient visible light driven photocatalysts
Source: Royal Society of Chemistry journal article supplement (doi:10.1039/c1jm12844b), 2011-01-01
Supplement: c1jm12844b.pdf [file c1jm12844b.pdf]

Supplementary Material (ESI) for Journal of Materials Chemistry  
This journal is (c) The Royal Society of Chemistry 2010

## Efficient synthesis of polymeric g-C<sub>3</sub>N<sub>4</sub> layered materials as novel efficient visible light driven photocatalyst

Fan Dong<sup>\*,a</sup>, Liwen Wu,<sup>a</sup> Yanjuan Sun,<sup>a</sup> Min Fu,<sup>a</sup> Zhongbiao Wu<sup>\*b</sup> and S. C. Lee<sup>c</sup>

<sup>a</sup> College of Environmental and Biological Engineering, Chongqing Technology and Business University, Chongqing, 400067, P. R. China.

<sup>b</sup> Department of Environmental Engineering, Zhejiang University, Hangzhou 310027, P. R. China.

<sup>c</sup> Department of Civil and Structural Engineering, Research Center for Environmental Technology and Management, The Hong Kong Polytechnic University, Hong Kong, P. R. China.

\* To whom correspondence should be addressed. E-mail: dfctbu@126.com, zbwu@zju.edu.cn

**Fig. S1** Enlarged view of XRD patterns in the range of 25-30 degree of g-C<sub>3</sub>N<sub>4</sub> obtained under different temperatures

**Fig. S2** FT-IR spectra in the range of 500-2000 cm<sup>-1</sup> of g-C<sub>3</sub>N<sub>4</sub> obtained under different temperatures

**Fig. S3** XPS spectra of C1s (a), N1s (b) and O1s (c) for CN-575 sample.

**Fig. S4** Room temperature PL of CN-450 and CN-575 samples (excitation light source: 280 nm)

**Fig. S5** Image of RhB solution before and after irradiation over CN550 sample

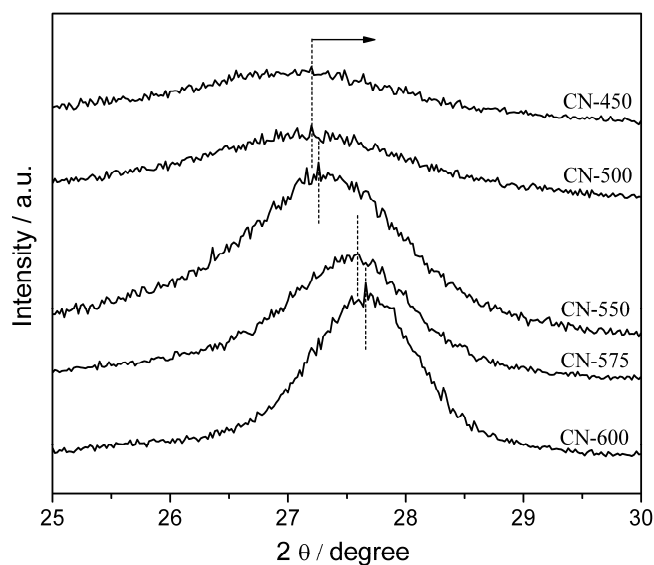

**Fig. S1** Enlarged view of XRD patterns in the range of 25-30 degree of g-C<sub>3</sub>N<sub>4</sub> obtained under different temperatures

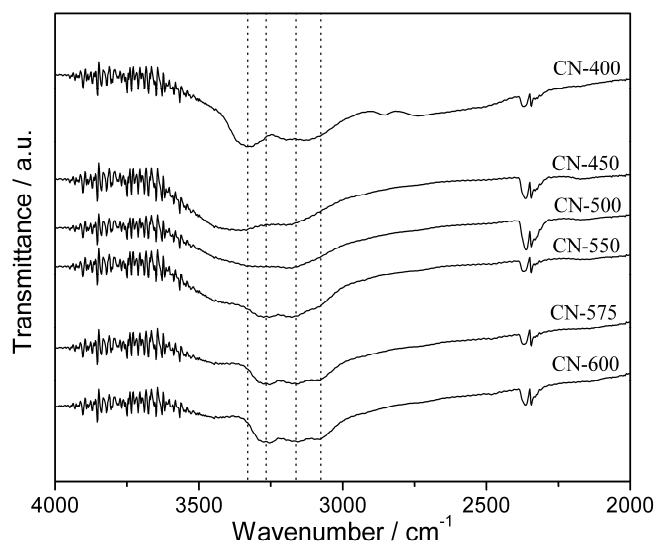

**Fig. S2** FT-IR spectra in the range of 2000-4000 cm<sup>-1</sup> of g-C<sub>3</sub>N<sub>4</sub> obtained under different temperatures

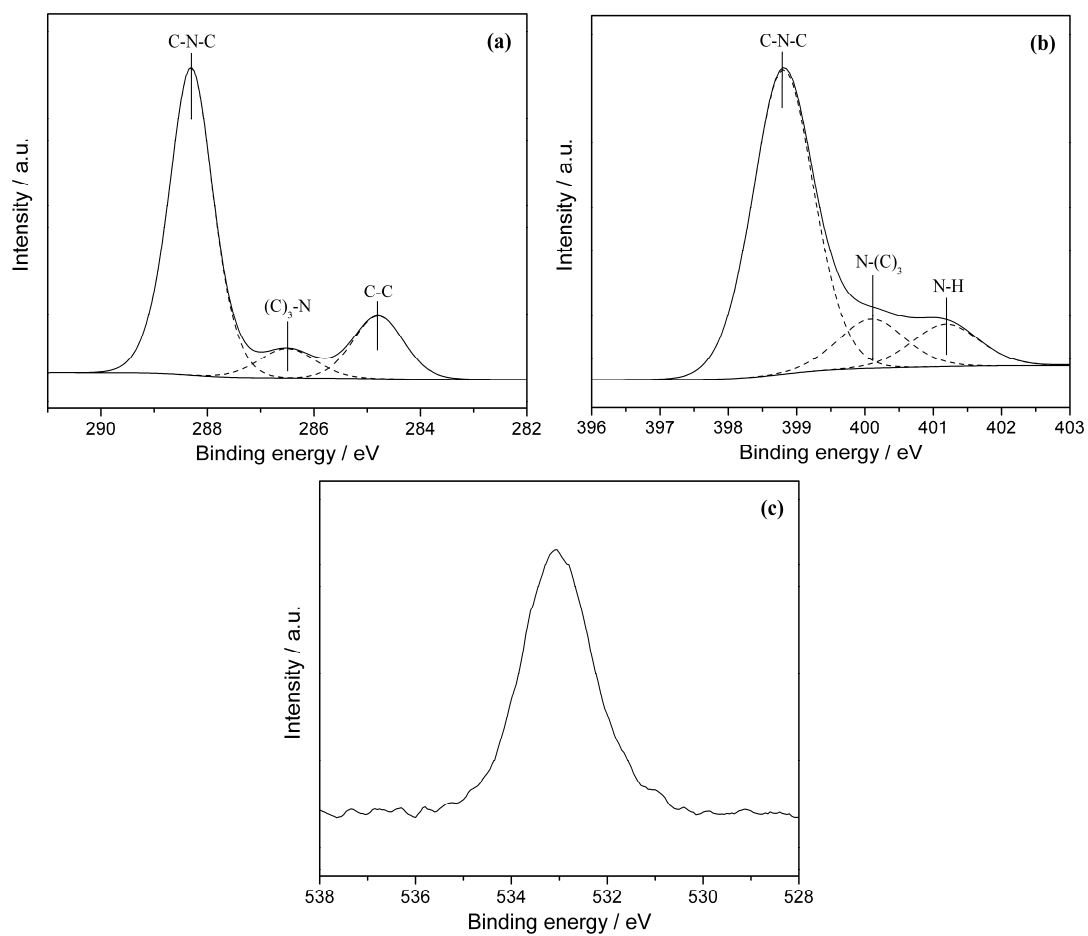

**Fig. S3** XPS spectra of C1s (a), N1s (b) and O1s (c) for CN-575 sample.

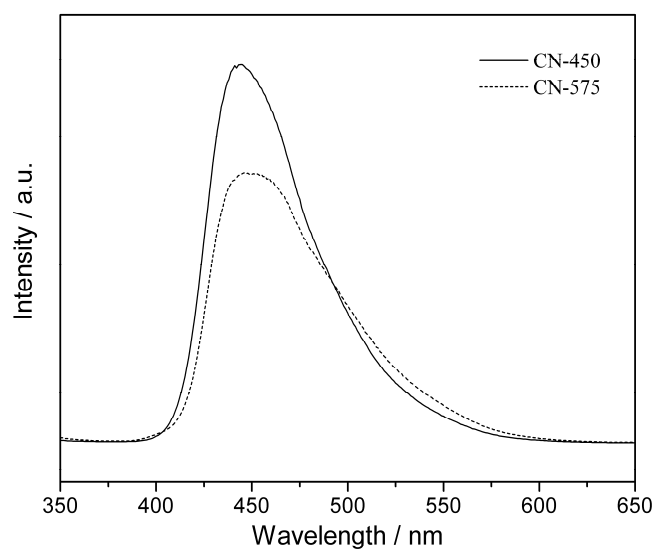

**Fig. S4** Room temperature PL of CN-450 and CN-575 samples (excitation light source: 280 nm)

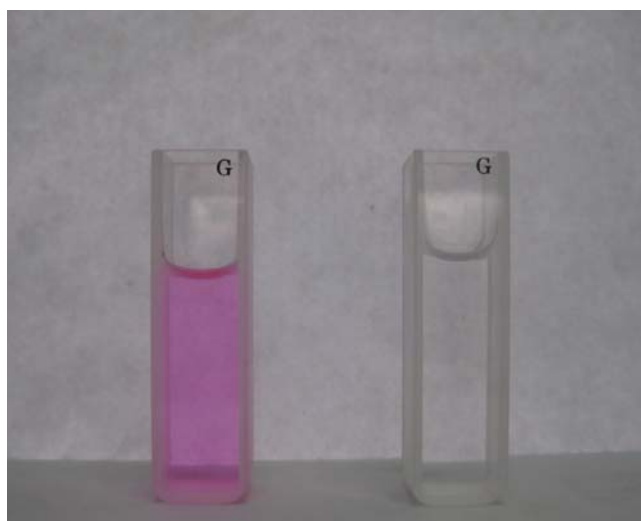

**Fig. S5** Image of RhB solution before and after irradiation over CN550 sample
